# Supplementary material for: Pain Intensity and Degree of Disability after Fragility Fractures of the Pelvis
Source: MDPI journal article supplement (doi:10.3390/medicina58040477), 2022-03-25
Supplement: s1 [file s1]

## Von Korff Pain Intensity and Disability Score

Questions Used to Grade Chronic Pain Status and disability

- (1) How would you rate your pain on a 0–10 scale at the present time (right now)? [Pain Right Now]

No pain

Pain as bad as it could be

0 1 2 3 4 5 6 7 8 9 10

- (2) After the fracture, how intense was your worst pain? [Worst Pain]

No pain

Pain as bad as it could be

0 1 2 3 4 5 6 7 8 9 10

- (3) After the fracture, on average, how intense was your pain? (That is, your usual pain at times you were experiencing pain) [Average Pain]

No pain

Pain as bad as it could be

0 1 2 3 4 5 6 7 8 9 10

- (4) After the fracture, how much has the pain interfered with your daily activities? [Daily Activities]

No interference

Unable to carry on any activities

0 1 2 3 4 5 6 7 8 9 10

- (5) After the fracture, how much has the pain changed your ability to take part in recreational social and family activities? [Social Activities]

No change

Extreme change

0 1 2 3 4 5 6 7 8 9 10

- (6) After the fracture, how much has the pain changed your ability to work (including housework)? [Work Activities]

No change

Extreme change

0 1 2 3 4 5 6 7 8 9 10

---

Pain intensity score = (((response question 1) + (response question 2) + (response question 3))/3)\*10

Disability score = (((response question 4) + (response question 5) + (response question 6))/3)\*10
